# Supplementary material
Source: HighWire-hosted journal article supplement (https://bmjopenquality.bmj.com/highwire/filestream/136175/field_highwire_adjunct_files/0/ds3712.docx)

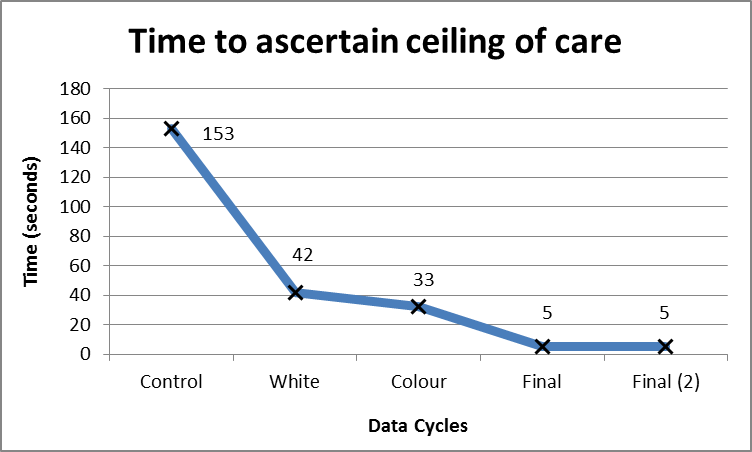

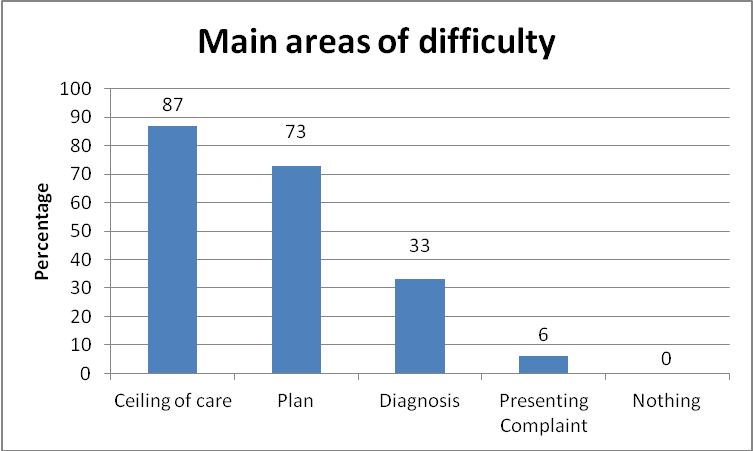

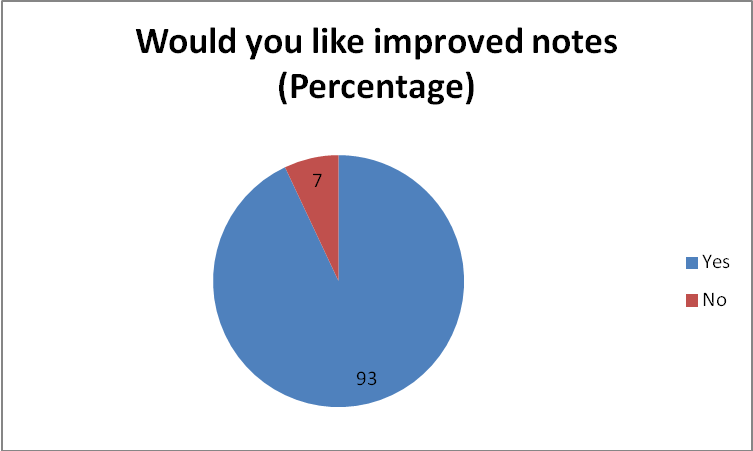

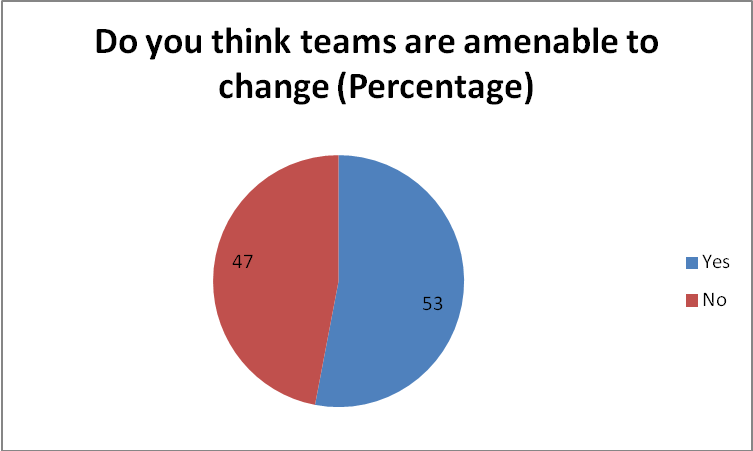

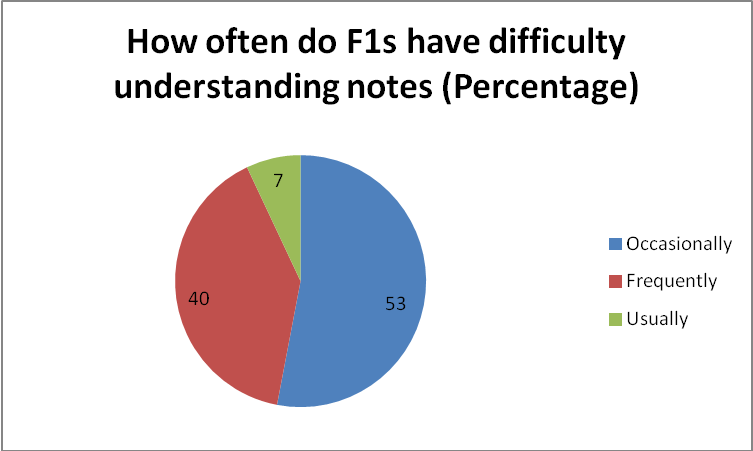

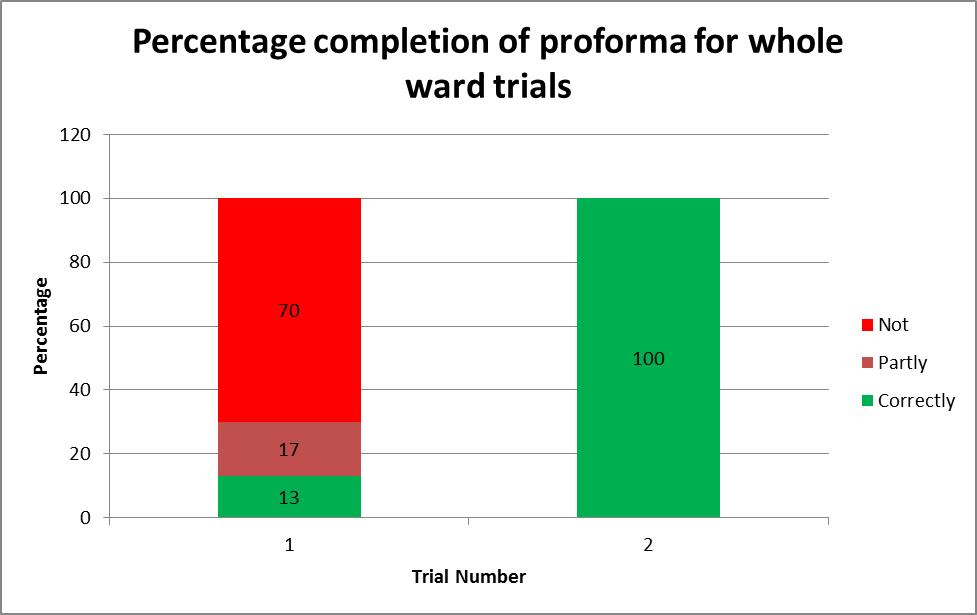

Supplement: ds3712.docx [file ds3712.docx]
